# Supplementary material for: MLX phosphorylation stabilizes the ChREBP-MLX heterotetramer on tandem E-boxes to control carbohydrate and lipid metabolism
Source: PubMed Central journal article supplement — bioRxiv. 2024 Sep 5:2024.09.04.611172. Preprint. [Version 2] doi: 10.1101/2024.09.04.611172 (PMC11398402; doi:10.1101/2024.09.04.611172), 2024-09-05

### Supplementary data table 1

| Primers                          |                                                                                                         |
|----------------------------------|---------------------------------------------------------------------------------------------------------|
| chrebp-HA_fwd                    | CCA GTG TGG TGG AAT TCT GCA TGG CGC GCG CGC TGG<br>CGG ATC TAT CCG TGA AC                               |
| chrebp-HA_rev                    | GCT GGA TAT CTT TAA GCG TAA TCT GGA ACA TCG TAT GGG<br>TAT AAT GGT CTC                                  |
| gibson-MLX_fw                    | CCA CTA GTC CAG TGT GGT GGG CGA TCG CCA TGA CGG AG                                                      |
| gibson-MLX_rv                    | ACT GTG CTG GAT ATC TGC AGT TAA ACC TTA TCG TCG TCA<br>TCC TTG TAA TC                                   |
| mm_MLX-alpha/beta_Rv             | CTT GAC CCA AGG GTC CTC                                                                                 |
| mm_MLX-alpha/beta_Fw             | GTC GAG TAT GCC TAC AGT GAC                                                                             |
| mm_MLX-alpha_Rv                  | AGG ATC CAG GCT GTT GTC                                                                                 |
| mm_MLX-alpha_Fw                  | GAT GAT GAG GAC AGT GAT TAT CAG                                                                         |
| mmMLX_S91AS94                    | AAG GGG GCT GTA GTG GCC AGA GCT AAT AGC ATC G                                                           |
| mmMLX_S86A                       | GTG GGC GGC TTC TAC AAA AAG CCC AGG ATC CAG GCT G                                                       |
| mmMLX_S101-106A-f                | GCC GCC GCT GCC GCT GCT GTC CCC AAC ACA GAT GAT G                                                       |
| mmMLX_S98A-rv                    | GCC GAT GGC ATT AGC TCT GGA CAC TAC A                                                                   |
| mmMLX_S115A-fw                   | GAG GAC GCT GAT TAT CAG CAG GAG TCC TAC AAG                                                             |
| mmMLX_T110A-rv                   | ATC ATC TGC GTT GGG GAC AGA AGA GGC ACT G                                                               |
| mmMLX_S86DT87D-rv                | GTG GTC GTC TTC TAC AAA AAG CCC AGG ATC CAG GCT G                                                       |
| mmMLX_S91DS94D-fw                | AAG GGG GAT GTA GTG GAC AGA GCT AAT AGC ATC G                                                           |
| mmMLX_S98D_rv                    | GCC GAT GTC ATT AGC TCT GGA CAC TAC A                                                                   |
| mmMLX_S101106D-fw                | GAC GAC GAT GCC GAT GAT GTC CCC AAC ACA GAT GAT G                                                       |
| mmMLX-T110D-rv                   | ATC ATC GTC GTT GGG GAC AGA AGA GGC ACT G                                                               |
| mmMLX_S115D-fw                   | GAG GAC GAT GAT TAT CAG CAG GAG TCC TAC AAG                                                             |
| mmMLX_105-115A_fw                | GCT GCT GTC CCC AAC GCA GAT GAT GAG GAC GAT GAT TAT<br>CAG CAG GAG TCC TAC AAG                          |
| mmMLX_94-103A_rv                 | GGC AGC GGC GGC GCC GAT GGC ATT AGC TCT GGC CAC<br>TAC ACT CCC CTT GTG GG                               |
| mmMLX_105-115D_fw                | GAT GAT GTC CCC AAC GAC GAT GAT GAG GAC GAT GAT TAT<br>CAG CAG GAG TCC TAC AAG                          |
| mmMLX_94-103D_rv                 | GGC ATC GTC GTC GCC GAT GTC ATT AGC TCT GTC CAC TAC<br>ACT CCC CTT GTG GG                               |
| mmMLX_105-110A_rv2               | ATC ATC TGC GTT GGG GAC AGC AGC G                                                                       |
| rnHK2-SA155 fw                   | TTC ACC TTC GCG TTC CCC TGC CAC CA                                                                      |
| rnHK2-SA155 rv                   | CAG GGG AAC GCG AAG GTG AAA CCC AGA GGG                                                                 |
| rnHK2-SA603 fw                   | ACA TTC GCC TTC CCT TGC CAG C                                                                           |
| rnHK2-SA603 rv                   | AGG GAA GGC GAA TGT GAA ACC CAA AGG C                                                                   |
| pUAST-mmMLX-<br>dmKozak_EcoRI_fw | GGG AAT TCC AAA ATG ACG GAG CCG GGC GCC TC<br>GGC TCG AGT CAG TAG AGT TGG TTT TTC AAC TGA TGA AGG<br>AC |
| MLX_cloning_XhoI_rv              |                                                                                                         |
| gRNA1-GSK3A FW                   | CAC CGG GCC ACC CGG TAC ACT GTC T                                                                       |
| gRNA1-GSK3A-RV                   | AAA CAG ACA GTG TAC CGG GTG GCC C                                                                       |
| gRNA2-GSK3A-FW                   | CAC CGG GAA CTA GTC GCC ATC AAG A                                                                       |
| gRNA2-GSK3A-RV                   | AAA CTC TTG ATG GCG ACT AGT TCC C                                                                       |
| GSK3A-gRNA1-seq-FW               | ATG CGT AAG CTG GAC CAC TG                                                                              |
| GSK3A-gRNA1-seq-RV               | ATT CAG TCA GGC CTT GCC TG                                                                              |
| GSK3A-gRNA2-seq-FW               | GTC CCC AAC GAG CTT CCT G                                                                               |
| GSK3A-gRNA2-seq-RV               | CAA GAA TTT GCT TAT TAA GCA CTT ACA TTG                                                                 |
| mm_Fasn-fw                       | GCT GCG GAA ACT TCA GGA AAT                                                                             |
| mm_Fasn-rv                       | AGA GAC GTG TCA CTC CTG GAC TT                                                                          |
| mm_Acly-fw                       | GCC AGC GGG AGC ACA TC                                                                                  |
| mm_Acly-rv                       | CTT TGC AGG TGC CAC TTC ATC                                                                             |
| pGEX4T2_fwd                      | CTA CAC GTA AGC GGC CGC ATC GTG ACT G                                                                   |
| pGEX4T2_rev                      | TCC GTC ATA ACC TGG GGA TCC ACG CGG A                                                                   |
| mlx_fwd                          | GAT CCC CAG GTT ATG ACG GAG CCG GGC G                                                                   |

|                      |                                                                     |
|----------------------|---------------------------------------------------------------------|
| mlx_rev              | ATG CGG CCG CTT ACG TGT AGA GTT GGT TTT TCA ACT GAT G               |
| RV_MLX_TID           | CAC AGT ATT GTC TTT GCT AGC GTA GAG TTG GTT TTT CAA CTG ATG AAG GAC |
| Fwd_MLX_mini_and_TID | GGA CAG CAC CGC TAG CAT GAC GGA GCC GGG CG                          |
| pcdna3.1_MLX_fwd     | CTG CAG ATA TCC AGC ACA GTG GCG G                                   |
| pcdna3.1_MLX_rev     | GAG CGG CCG CGT ACG CGT                                             |
| eGFP_fwd             | ACA CGC GTA CGC GGC CGC TCG TGA GCA AGG GCG AGG AG                  |
| eGFP_rev             | ACT GTG CTG GAT ATC TGC AGT TAC TTG TAC AGC TCG TCC ATG             |
| mmChREBP-S140A-fw    | CGG AGG AAG GCC CCA GTG TGT GGT TTC G                               |
| mmChREBP-S140A-rv    | CAC TGG GGC CTT CCT CCG TTG CAC ATA CTG                             |
| mmChREBP-S196A-fw    | CGT AAG TCC GCC AGG GAA GGG GAT TTC CTG                             |
| mmChREBP-S196A-rv    | TTC CCT GGC GGA CTT ACG GAG CCG CTT TTT G                           |
| mmChREBP-S626A-fw    | CGG CGA CTA GCC GGG GAT CTC AAC TCC ATA C                           |
| mmChREBP-S626A-rv    | GAG ATC CCC GGC TAG TCG CCG CTC ACT GCC                             |
| mmChREBP-T665A-fw    | CGA CGT ATC GCC CAC ATC TCC GCG GAG CAG                             |
| mmChREBP-T665A-rv    | GGA GAT GTG GGC GAT ACG TCG GTT CTC CAT CTT G                       |

## Supplementary data table 2

| Antibodies                                          |                                |                    |
|-----------------------------------------------------|--------------------------------|--------------------|
| Akt (pan)                                           | Cell Signaling Technology, Inc | Cat#2920, (40D4)   |
| Phospho-Akt (Ser473)                                | Cell Signaling Technology, Inc | Cat#4060, (D9E)    |
| CK2 $\alpha$                                        | Cell Signaling Technology, Inc | Cat#2656           |
| DYKDDDDK Tag                                        | Cell Signaling Technology, Inc | Cat#8146, (9A3)    |
| GSK-3 $\alpha/\beta$                                | Cell Signaling Technology, Inc | Cat#5676, (D75D3)  |
| HA-Tag                                              | Cell Signaling Technology, Inc | Cat#3724, (C29F4)  |
| HA-Tag                                              | Cell Signaling Technology, Inc | Cat#2367, (6E2)    |
| Hexokinase II                                       | Cell Signaling Technology, Inc | Cat#2867, (C64G5)  |
| MLX                                                 | Cell Signaling Technology, Inc | Cat#85570, (D8G6W) |
| S6 Ribosomal Protein                                | Cell Signaling Technology, Inc | Cat#2217, (5G10)   |
| Phospho-S6 Ribosomal Protein (Ser235/236)           | Cell Signaling Technology, Inc | Cat#4856, (2F9)    |
| Calnexin                                            | Invitrogene                    | Cat#PA5-34754      |
| Anti-Thiophosphate ester antibody                   | Abcam                          | Cat#ab92570        |
| IRDye® 800CW Goat anti-Rabbit IgG                   | LI-COR Biotech                 | Cat#926-32211      |
| IRDye® 680RD Goat anti-Mouse IgG Secondary Antibody | LI-COR Biotech                 | Cat#926-68070      |
| Anti-FLAG® M2 Affinity Gel                          | Sigma-Aldrich                  | A2220              |

### Supplementary data table 3

| Plasmids                  |                                     |                            |
|---------------------------|-------------------------------------|----------------------------|
| pMSCV-ChREBPalpha         | Michael Schupp Lab (PMID: 26181104) | N/A                        |
| pCMV-MLX-myc-FLAG         | Origene                             | Cat#MR204137               |
| pCDNA 3.1 -ChREBP-HA      | This paper                          | N/A                        |
| pCDNA 3.1 -MLX            | This paper                          | N/A                        |
| pCDNA 3.1 -MLX-A (94-115) | This paper                          | N/A                        |
| pCDNA 3.1 -MLX-D (94-115) | This paper                          | N/A                        |
| pCDNA 3.1 -MLX-S110-115A  | This paper                          | N/A                        |
| pGL3-ChoRE-luc            | Michael Schupp Lab (PMID: 33023907) | N/A                        |
| pNL1.1[Nluc/TK]           | Promega                             | Cat#N150A                  |
| pCDNA 3.1 -rnHK2          | This paper                          | N/A                        |
| Lenti-CRISPR-V2-GSK3A-1   | This paper                          | N/A                        |
| Lenti-CRISPR-V2-GSK3A-2   | This paper                          | N/A                        |
| pCDNA 3.1 -MLX-alpha      | This paper                          | N/A                        |
| pCDNA 3.1 -MLX-beta       | This paper                          | N/A                        |
| 3xHA-TurboID-NLS_pCDNA3   | Alice Ting Lab (Addgene)            | Addgene plasmid Cat#107171 |
| pCDNA 3.1 -MLX-TurboID    | This paper                          | N/A                        |
| lentiCRISPR v2            | Feng Zhang Lab (Addgene)            | Addgene plasmid Cat#52961  |
| pGEX-MLX-WT               | This paper                          | N/A                        |
| pGEX-MLX-WT               | This paper                          | N/A                        |
| pUAST-mMLX-WT             | This paper                          | N/A                        |
| pUAST-mMLX-WT             | This paper                          | N/A                        |

**Figure supplementary 1. MLX phosphorylation promotes ChREBP-MLX activity, related to Fig. 1.**

- a. Phosphorylation sites on MLX alpha, beta, or gamma isoforms according to PhosphoSitePlus® (<https://phosphosite.org>).
- b. MLX phosphorylation in 293T cells expressing MLX-WT or -A. Protein lysates were treated with calf intestine phosphatase (CIP) or CIP and phosphatase (PP) inhibitors. N=3.
- c. Luciferase reporter assay for ChREBP-MLX activity.
- d. ChREBP-MLX luciferase reporter activity in 293T expressing ChREBP, MLX-WT, and either HK2 or GCK. Cells were starved for glucose and treated with 25 mM glucose for 3 hours. One-way ANOVA, \*\*\* $p < 0.001$ , \*\*\*\* $p < 0.0001$ . N=3.
- e. ChREBP-MLX luciferase reporter activity in 293T cells expressing ChREBP, MLX-WT, and either HK2 or kinase dead HK2 (HK2-KD). Cells were starved for glucose and treated with 25 mM glucose for 3 hours. One-way ANOVA, \*\*\* $p < 0.001$ , \*\*\*\* $p < 0.0001$ . N=3.
- f. ChREBP-MLX luciferase reporter activity in 293T expressing HK2, MLX-WT or -A and either ChREBP-WT or -4A. Cells were starved for glucose and treated with 25 mM glucose for 3 hours. One-way ANOVA, \*\* $p < 0.01$ , \*\*\*\* $p < 0.0001$ , ns=not significant. N=3.

**Figure supplementary 2. MLX phosphorylation on an evolutionarily conserved motif promotes sugar response in *Drosophila*, related to Fig. 2.**

- a. Evolutionary relationships of the MLX sequence among animal species. Branching order shows the relationships between species and branch length displays the amount of evolutionary change between the nodes.
- b. Quantification of lipid staining in Fig. 2g, each point represents lipid signals per cell. Two-way ANOVA, \*\*\*\* $p < 0.0001$ . n=5.
- c. Quantification of lipid staining in Fig. 2g, each point represents lipid signals normalized by cell volume. Two-way ANOVA, \* $p < 0.05$ , \*\* $p < 0.01$ , \*\*\*\* $p < 0.0001$ , ns=not significant. n=5.
- d. Hemolymph glucose levels in 3<sup>rd</sup> instar control, *mlx*<sup>1</sup>, *mMlx-WT* or *mMlx-A* grown in LSD or MSD. Two-way ANOVA, \* $p < 0.05$ , \*\*\* $p < 0.001$ , ns=not significant. N=3.

**Figure supplementary 3. MLX phosphorylation is required for the binding of ChREBP-MLX heterotetrameric complex on the ChoRE, related to Fig. 3.**

- a. Model of ChREBP-phosphorylated MLX (pMLX) structure by AlphaFold 3 with confidence scores.
- b. Immunoprecipitated MLX and ChREBP proteins from in 293T cells expressing MLX-WT or -A with or without ChREBP for Electrophoretic mobility shift assay (EMSA) experiments in Fig. 3d.
- c. EMSA with antibodies against ChREBP or MLX validating band identity from Fig. 3d and 5j.
- d-g. Quantification in Fig. 3D. t test, \* $p < 0.05$ , \*\*\*\* $p < 0.0001$ , ns=not significant. N=3-4.

**Figure supplementary 4. Identification of CK2 and GSK3 as MLX kinases, related to Fig. 4.**

- a. MLX phosphorylation in 293T cells treated with the mTORC1 inhibitor rapamycin or mTORC1/mTORC2 dual inhibitor torin2. Cells were starved for glucose overnight, pretreated with 100 nM rapamycin or 250 nM torin2 for 30 min, and treated with 25 mM glucose for 60 min. S6-pS235/236 and AKT-pS473 serve as positive controls for mTORC1 and mTORC2 inhibition, respectively. CALX serves as a loading control. N=3.
- b. MLX phosphorylation in 293T cells expressing TurboID-tagged MLX- WT, -A and -D. N=3.
- c. Biotinylated proteins in 293T cells expressing TurboID-tagged MLX-WT, HK2 and ChREBP. Streptavidin blot serves as a control for biotinylation. N=3.
- d-e. MLX phosphorylation in WT, GSK3-a KO, GSK3-b KD or GSK3-a/b KO/KD 293T cells. GSK3-a/b serves as a control for KO/KD. One-way ANOVA, \* $p < 0.05$ . N=3.
- f. ChREBP-MLX luciferase reporter activity in 293T cells expressing ChREBP and HK2 with MLX-WT, 94-115A, or 110-115A. Cells were starved for glucose overnight and treated with 25 mM glucose for 3 hours. One-way ANOVA, \* $p < 0.05$ , \*\*\*\* $p < 0.0001$ , ns=not significant. N=3.

**Figure supplementary 5. G6P accumulation inhibits CK2-mediated MLX phosphorylation and the binding of ChREBP-MLX tetramer on the ChoRE, related to Fig. 5.**

- a. MLX phosphorylation in 293T cells transfected with HK2 or empty plasmid. Cells were starved for glucose overnight and refeed with 2DG for 60 min. CALX serves as a loading control. N=3.
- b. *Acy* and *Fasn* mRNA levels in 3T3 L1 adipocytes treated with 25  $\mu$ M glucose or 2DG for 30 min. one-way ANOVA, \*\*\*\* $p < 0.0001$ , ns=not significant. N=6.

**c.** Immunoprecipitated MLX and ChREBP proteins used for EMSA experiments in Fig. 5J. 293T cells expressing MLX-WT with or without ChREBP were treated with glucose or 2DG for 60 min.

**d-i.** Quantification in Fig. 5J. t-test, \* $p < 0.05$ , \*\*\* $p < 0.001$ , \*\*\*\* $p < 0.0001$ , ns=not significant. N=3-4.

# Figure S1

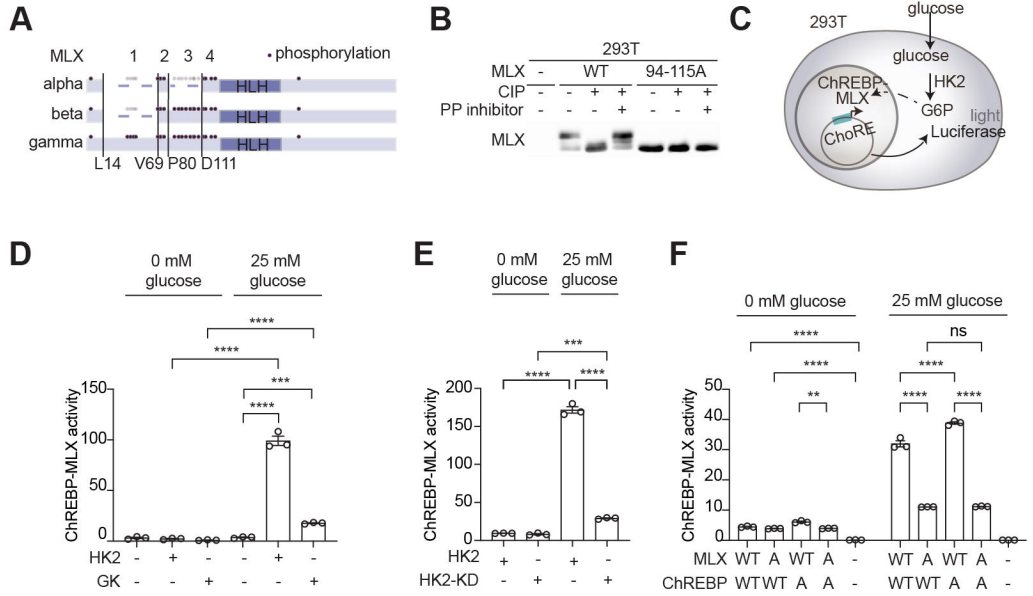

**Figure S2**

**A**

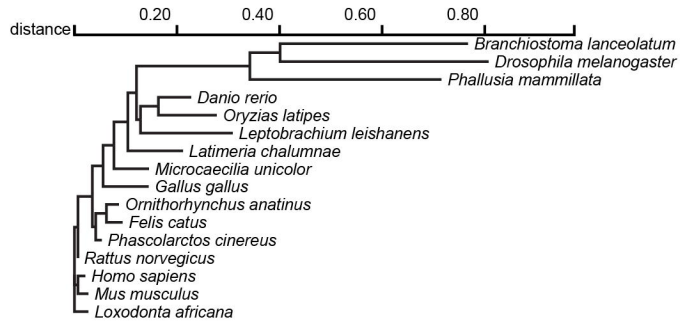

**B**

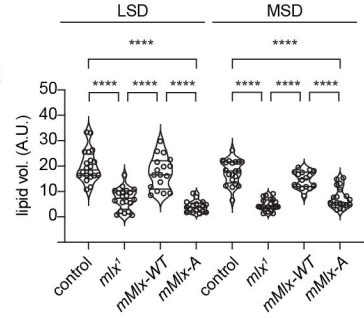

**C**

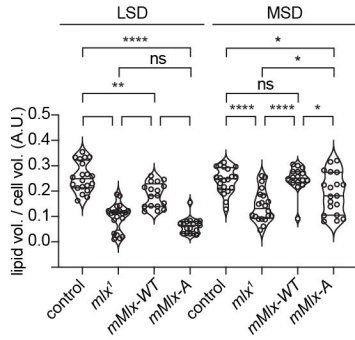

**D**

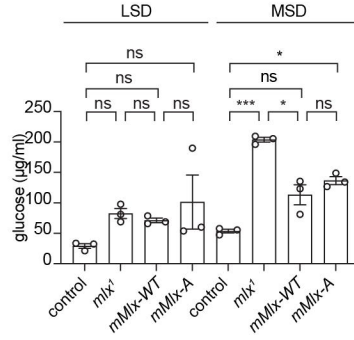



**Figure S3****A**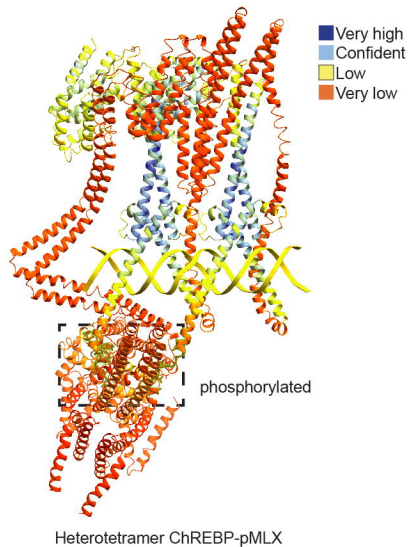**B**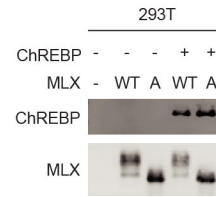**C**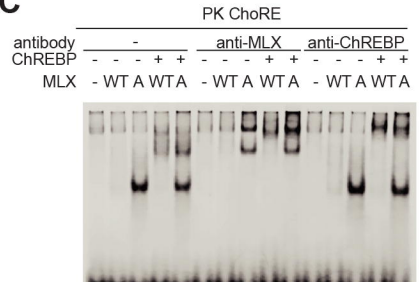**D**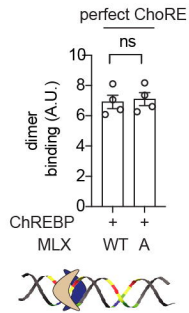**E**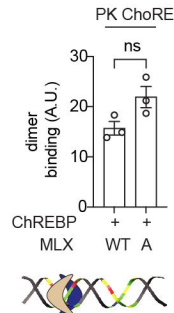**F**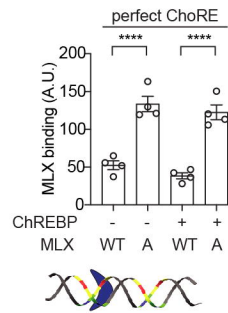**G**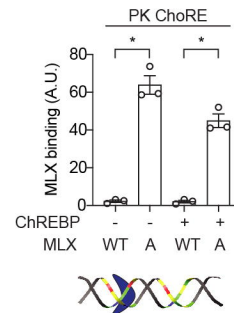

# Figure S4

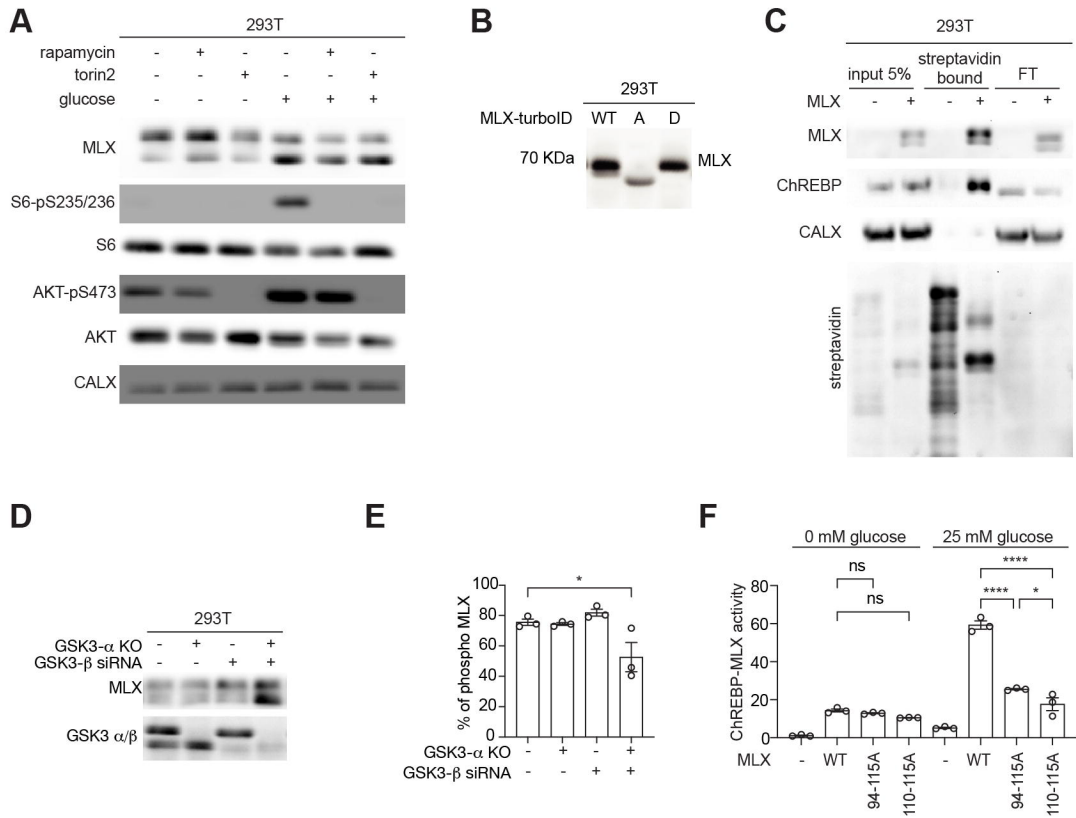

**Figure S5**

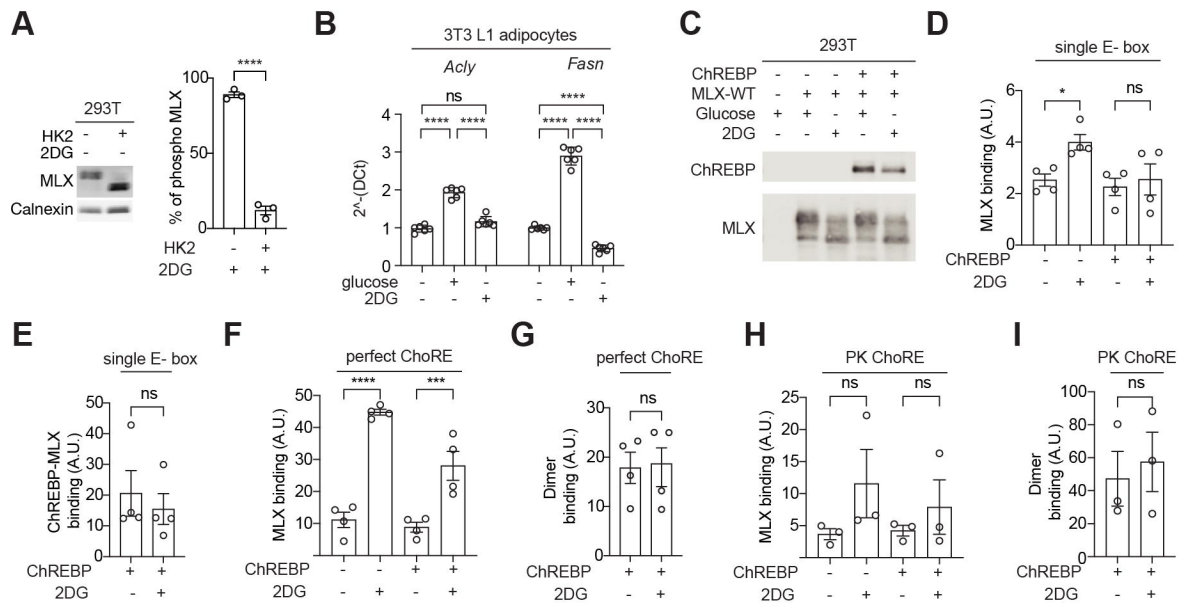

Supplement: NIHPP2024.09.04.611172v2-supplement-1.pdf [file NIHPP2024.09.04.611172v2-supplement-1.pdf]
